# Supplementary material
Source: ML conference proceedings conference paper supplement (https://proceedings.neurips.cc/paper_files/paper/2011/hash/d709f38ef758b5066ef31b18039b8ce5-Abstract.html)
Supplement: Supplementary file 1 [file d709f38ef758b5066ef31b18039b8ce5-Supplemental.zip]

Archive with 1 entries (1 files):
- all/Paper 370/2SW-MDA-manus-supplement.pdf
